# Supplementary material for: Evolution and functional characterization of CAZymes belonging to subfamily 10 of glycoside hydrolase family 5 (GH5_10) in two species of phytophagous beetles
Source: PubMed Central journal article supplement (PMC5576741; doi:10.1371/journal.pone.0184305), 2017-08-30
Supplement: pone.0184305.s006.pdf [file pone.0184305.s006.pdf]

**S1 Table. List of primers used in this study.**

| Gene             | Primer name         | Sequence (5' – 3')                           | Function                   |
|------------------|---------------------|----------------------------------------------|----------------------------|
| GVII             | GVII_ORF_F          | ACCATGGAAGTCGCTGTGGTATTTCG                   | Cloning pIB/V5-His TOPO/TA |
| GVII             | GVII_ORF_R          | AAGGGTCACATGGACATTGCCGTTG                    | Cloning pIB/V5-His TOPO/TA |
| CMA1             | CMA1_ORF_F          | ACCATGGTCAAGATGAAGGTGAT                      | Cloning pIB/V5-His TOPO/TA |
| CMA1             | CMA1_ORF_R          | CAACTTTATATTAATCTTTCCATGG                    | Cloning pIB/V5-His TOPO/TA |
| CMA2             | CMA2_ORF_F          | ACCATGGCCACGATCAAGATGAAGGT                   | Cloning pIB/V5-His TOPO/TA |
| CMA2             | CMA2_ORF_R          | CAACTTTATATCAATCTTTCCGTTG                    | Cloning pIB/V5-His TOPO/TA |
| CMA3             | CMA3_ORF_F          | ACCATGGTCAAGATGAAAGCGGT                      | Cloning pIB/V5-His TOPO/TA |
| CMA3             | CMA3_ORF_R          | CAACTTTATGTCAATCTTTCCATTG                    | Cloning pIB/V5-His TOPO/TA |
| CMA4             | CMA4_ORF_F          | ACCATGGAAATTGGATCCGCTCTGCT                   | Cloning pIB/V5-His TOPO/TA |
| CMA4             | CMA4_ORF_R          | CAGCCGAATATCAATCCTCCCA                       | Cloning pIB/V5-His TOPO/TA |
| CMA5             | CMA5_ORF_F          | ACCATGGAAC TTGGATCCGCACTGCT                  | Cloning pIB/V5-His TOPO/TA |
| CMA5             | CMA5_ORF_R          | CAGCCTAATATCAATCCTCCCA                       | Cloning pIB/V5-His TOPO/TA |
| GVII             | GVII_dsRNA_F        | TAATACGACTCACTATAGGGAGCACCAACAAC TTGATCAACAG | dsRNA generation           |
| GVII             | GVII_dsRNA_R        | TAATACGACTCACTATAGGGAGTTCTTGAAGGGACTGGAGGT   | dsRNA generation           |
| GFP              | GFP_dsRNA_F         | TAATACGACTCACTATAGGCACATGAAGCAGCAGACTT       | dsRNA generation           |
| GFP              | GFP_dsRNA_R         | TAATACGACTCACTATAGGTGCTCAGGTAGTGGTTGTCG      | dsRNA generation           |
| GVII             | GVII_F              | CAACTATGGATGGGACTTCG                         | Quantitative PCR           |
| GVII             | GVII_R              | GATGTGCACCCAAACTCTGA                         | Quantitative PCR           |
| GVI_RpS3         | GVI_RpS3_F          | GCAGGATCCGTGAGTTGAC                          | Quantitative PCR           |
| GVI_RpS3         | GVI_RpS3_R          | ACAGGCCTCGATTGGCTAC                          | Quantitative PCR           |
| CMA1             | CMA1_F              | AGAAGACACCCAATCGCTGA                         | Quantitative PCR           |
| CMA1             | CMA1_R              | CTGCAGCCTATCTTCCTGGT                         | Quantitative PCR           |
| CMA2             | CMA2_F              | ACTCTGTGGACTTTGGAGGG                         | Quantitative PCR           |
| CMA2             | CMA2_R              | TTGTCTTTCAGGCCTGCAAC                         | Quantitative PCR           |
| CMA3             | CMA3_F              | TCAGGAGAGTTCACCACCAC                         | Quantitative PCR           |
| CMA3             | CMA3_R              | CTGTGCATGGCGTAGAAGTC                         | Quantitative PCR           |
| CMA4             | CMA4_F              | AACCCTTGCTTTGACACCAC                         | Quantitative PCR           |
| CMA4             | CMA4_R              | CACAGCGCTTTAGGATCCAC                         | Quantitative PCR           |
| CMA_EF1 $\alpha$ | CMA_EF1 $\alpha$ _F | AAGGCCTCCACACACATAGG                         | Quantitative PCR           |
| CMA_EF1 $\alpha$ | CMA_EF1 $\alpha$ _R | AAGGTTGATCGTCGTTCTGG                         | Quantitative PCR           |
