# Supplementary material for: Evolution and functional characterization of CAZymes belonging to subfamily 10 of glycoside hydrolase family 5 (GH5_10) in two species of phytophagous beetles
Source: PubMed Central journal article supplement (PMC5576741; doi:10.1371/journal.pone.0184305), 2017-08-30
Supplement: pone.0184305.s007.pdf [file pone.0184305.s007.pdf]

**S2\_Table. Details of the amino acid sequences used for the phylogenetic analysis.**

| <b>Specie name</b>                                             | <b>abbreviation</b> | <b>Accession number</b> | <b>Notes</b>               |
|----------------------------------------------------------------|---------------------|-------------------------|----------------------------|
| <b>Bacteria</b>                                                |                     |                         |                            |
| <i>Fibrobacter succinogenes</i> subsp. <i>succinogenes</i> S85 | FSU1                | ACX74338.1              | Fibroacteres               |
| <i>Flammeovirga</i> sp. MY04                                   | FLA1                | ANQ49303.1              | Bacteroidetes              |
| <i>Flammeovirga</i> sp. MY04                                   | FLA2                | ANQ52741.1              | Bacteroidetes              |
| <i>Flammeovirga yaeyamensis</i>                                | FYA1                | ACA05117.2              | Bacteroidetes              |
| <i>Melioribacter roseus</i> P3M-2                              | MRO1                | AFN74927.1              | Ignavibacteriae            |
| <i>Saccharophagus degradans</i> 2-40                           | SDE1                | ABD81545.1              | Proteobacteria (gamma)     |
| <i>Spirochaeta thermophila</i> DSM 6192                        | STH1                | ADN01068.1              | Spirochaetes               |
| <i>Spirochaeta thermophila</i> DSM 6578                        | STH2                | AEJ60366.1              | Spirochaetes               |
| Uncultured bacterium                                           | UBA1                | AEV59732.1              |                            |
| <i>Vibrio natriegens</i>                                       | VNA1                | ANQ24656.1              | Proteobacteria (gamma)     |
| <b>Insects</b>                                                 |                     |                         |                            |
| <i>Gastrophysa viridula</i>                                    | GV11                | ADU33333.1              | Arthropoda (Coleoptera)    |
| <i>Callosobruchus maculatus</i>                                | CMA1                | ADU33271.1              | Arthropoda (Coleoptera)    |
| <i>Callosobruchus maculatus</i>                                | CMA2                | ADU33272.1              | Arthropoda (Coleoptera)    |
| <i>Callosobruchus maculatus</i>                                | CMA3                | ADU33273.1              | Arthropoda (Coleoptera)    |
| <i>Callosobruchus maculatus</i>                                | CMA4                | ADU33274.1              | Arthropoda (Coleoptera)    |
| <i>Tricholepidion gertschi</i>                                 | TGE1                | GASO02036642            | Arthropoda (Zygentoma)     |
| <i>Tricholepidion gertschi</i>                                 | TGE2                | GASO02042472            | Arthropoda (Zygentoma)     |
| <i>Thermobia domestica</i>                                     | TDO1                | GASN02045897            | Arthropoda (Zygentoma)     |
| <i>Thermobia domestica</i>                                     | TDO2                | GASN02045380            | Arthropoda (Zygentoma)     |
| <i>Machilis hrabei</i>                                         | MHR1                | GAUM02040243            | Arthropoda (Archaeognatha) |
| <i>Eurylophella</i> sp. AD-2013                                | EUR1                | GAZG02013172            | Arthropoda (Ephemeroptera) |
| <i>Isonychia bicolor</i>                                       | IB11                | GAXA02038640            | Arthropoda (Ephemeroptera) |
| <b>Collembola</b>                                              |                     |                         |                            |
| <i>Cryptopygus antarcticus</i>                                 | CAN1                | ABV68808.1              | Arthropoda                 |
| <i>Orchesella cincta</i> OC12957                               | OCI1                | GAMM01012947            | Arthropoda                 |
| <i>Sminthurus viridis</i>                                      | SV11                | GATZ02024785            | Arthropoda                 |
| <i>Folsomia candida</i>                                        | FCA1                | GASX02002882            | Arthropoda                 |
| <i>Pogonognathellus</i> sp. AD-2013                            | POG1                | GATD02008031            | Arthropoda                 |
| <i>Tetradontophora bielaniensis</i>                            | TBI1                | GAXI02022226            | Arthropoda                 |
| <b>Crustacea</b>                                               |                     |                         |                            |
| <i>Limnoria quadripunctata</i>                                 | LQU1                | ADE58567.1              | Arthropoda                 |
| <i>Limnoria quadripunctata</i>                                 | LQU2                | ADE58568.1              | Arthropoda                 |
| <i>Limnoria quadripunctata</i>                                 | LQU3                | ADE58569.1              | Arthropoda                 |
| <i>Hyalella azteca</i>                                         | HAZ1                | XP_018022370.1          | Arthropoda                 |
| <i>Daphnia pulex</i>                                           | DPU1                | EFX71596.1              | Arthropoda                 |
| <i>Daphnia pulex</i>                                           | DPU2                | EFX71597.1              | Arthropoda                 |
| <i>Proasellus grafi</i>                                        | PGR1                | HAEX01030896            | Arthropoda                 |
| <i>Talitrus saltator</i>                                       | TSA1                | GDUJ01040948            | Arthropoda                 |
| <i>Cherax quadricarinatus</i>                                  | CQU1                | HACK01027957            | Arthropoda                 |
| <b>Chelicerata</b>                                             |                     |                         |                            |
| <i>Nothrus palustris</i>                                       | NPA1                | GEYJ01076133            | Arthropoda                 |
| <i>Nothrus palustris</i>                                       | NPA2                | GEYJ01112851            | Arthropoda                 |
| <i>Nothrus palustris</i>                                       | NPA3                | GEYJ01073735            | Arthropoda                 |
| <i>Platynothrus peltifer</i>                                   | PPE1                | GEYZ01027687            | Arthropoda                 |
| <i>Platynothrus peltifer</i>                                   | PPE2                | GEYZ01016327            | Arthropoda                 |
| <i>Platynothrus peltifer</i>                                   | PPE3                | GEYZ01010130            | Arthropoda                 |
| <i>Steganacarus magnus</i>                                     | SMA1                | GEYQ01012964            | Arthropoda                 |
| <i>Steganacarus magnus</i>                                     | SMA2                | GEYQ01047325            | Arthropoda                 |
| <b>Gastropoda</b>                                              |                     |                         |                            |
| <i>Aplysia kurodai</i>                                         | AKU1                | BAJ60954.1              | Mollusca                   |
| <i>Biomphalaria glabrata</i>                                   | BGL1                | AAV91523.1              | Mollusca                   |
| <i>Haliotis discus discus</i>                                  | HDI1                | ACJ12612.1              | Mollusca                   |
| <i>Haliotis discus discus</i>                                  | HDI2                | ACJ12613.1              | Mollusca                   |
| <i>Haliotis discus hamai</i>                                   | HDI3                | BAE78456.1              | Mollusca                   |
| <i>Limacina antarctica</i>                                     | LAN1                | GDRM01030628            | Mollusca                   |
| <i>Elysia timida</i>                                           | ET11                | GBRM01102742            | Mollusca                   |
| <i>Deroceras reticulatum</i>                                   | DRE1                | JW037389                | Mollusca                   |
| <i>Pomacea canaliculata</i>                                    | PCA1                | GBZZ01045211            | Mollusca                   |

**Bivalvia***Mytilus edulis**Scapharca broughtonii**Crassostrea gigas**Villosa lienosa*

MED1

SBR1

CG11

VLI1

CAC81056.1

GEXI01012405

GECI01038763

JR521835

Mollusca

Mollusca

Mollusca

Mollusca">

---
