# Supplementary material for: Evolution and functional characterization of CAZymes belonging to subfamily 10 of glycoside hydrolase family 5 (GH5_10) in two species of phytophagous beetles
Source: PubMed Central journal article supplement (PMC5576741; doi:10.1371/journal.pone.0184305), 2017-08-30
Supplement: pone.0184305.s008.pdf [file pone.0184305.s008.pdf]

**S3 Table. Statistical analysis of tissue specific gene expression (Fig S2).**

| Species             | Gene  | t-value | p-value |
|---------------------|-------|---------|---------|
| <i>G. viridula</i>  | GH5   | 16.092  | 0.004   |
|                     | GH5-1 | 4.525   | 0.006   |
| <i>C. maculatus</i> | GH5-2 | 9.019   | 0.003   |
|                     | GH5-3 | 30.468  | <0.001  |
|                     | GH5-4 | 7.422   | 0.002   |
